# Supplementary material
Source: publisher figshare collection journal article supplement (https://acs.figshare.com/ndownloader/files/3849283)
Supplement: Supplementary file 1 [file 3849283]

# Supporting Information

Monolithic polymeric aerogels with VOCs sorbent  
nanoporous crystalline and water sorbent amorphous  
phases.

*Vincenzo Venditto<sup>\*1</sup>, Marina Pellegrino<sup>1</sup>, Rosa Califano<sup>1</sup>, Gaetano Guerra<sup>1</sup>, Christophe Daniel<sup>1</sup>,  
Luigi Ambrosio<sup>2</sup>, Anna Borriello<sup>2\*</sup>*

<sup>1</sup>Department of Chemistry and Biology, Nanomates Center and INSTM Research Unit, University  
of Salerno, via Gio-vanni Paolo II, 84084 Fisciano (SA), Italy

<sup>2</sup>Institute for Polymers, Composites and Biomaterials, National Research Council of Italy, P.le  
Fermi,1 80055 Portici Naples

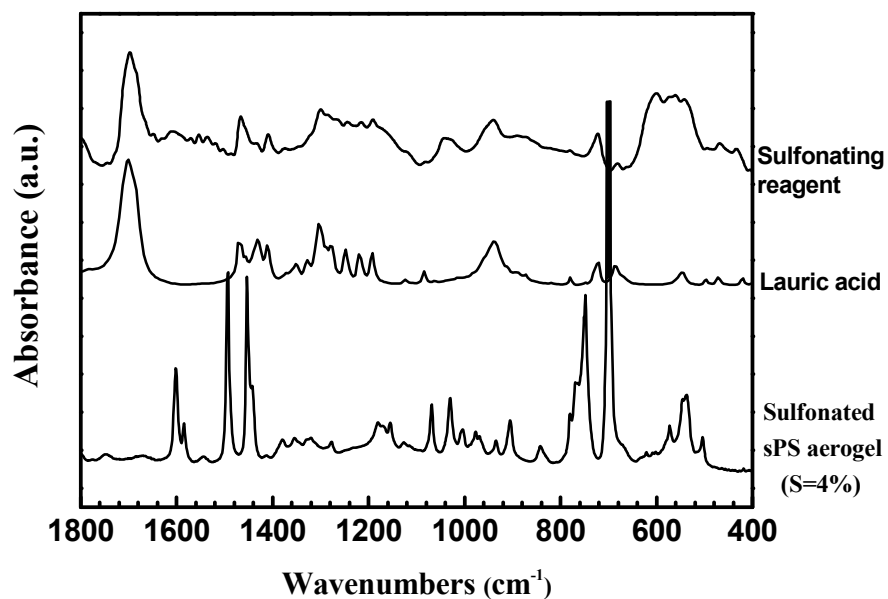

**Figure S1.** FTIR spectra in the wavenumber range 1800-400  $\text{cm}^{-1}$  of the sulfonated sPS aerogel (S=4%), lauric acid and sulfonating reagent.

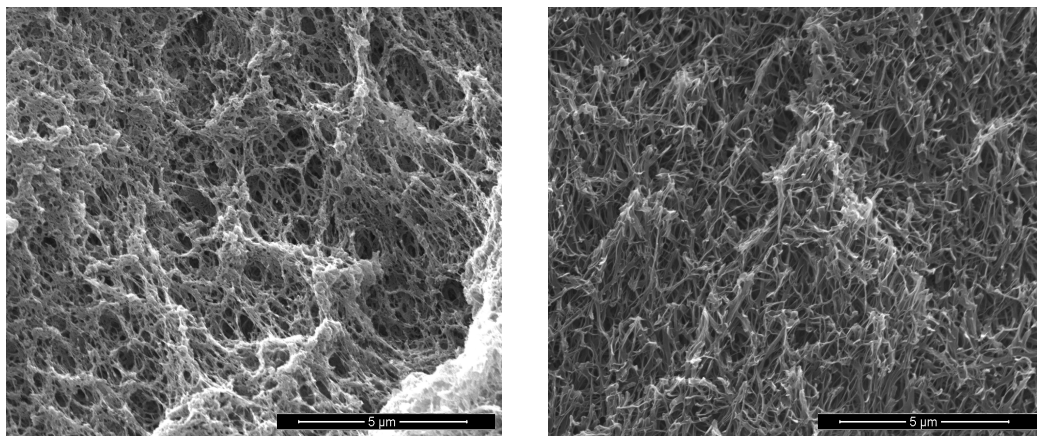

**Figure S2.** SEM micrographs of an unsulfonated aerogel (left) and of a sulfonated aerogel with S=20% (right) being obtained from gels prepared in 1,2-dichloroethane at  $C_{\text{pol}} = 0.1 \text{ g/g}$ .

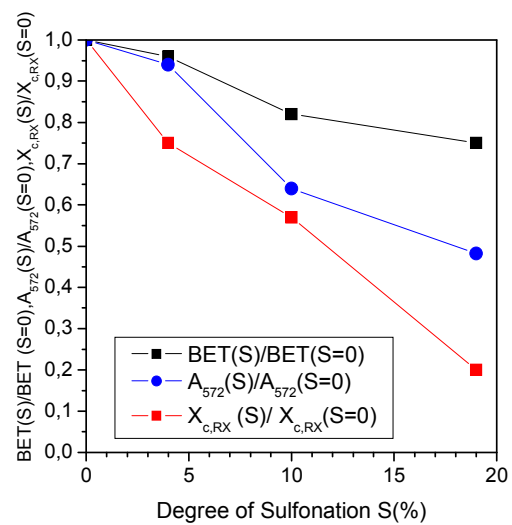

**Figure S3.** Variation of the BET values,  $572\text{ cm}^{-1}$  s(2/1)2 helical absorbance band, and X-ray diffraction crystalline degree values for sulfonated DCE-based aerogels; normalization is made with respect to the unsulfonated aerogel values.
